# Supplementary material for: Gene expression in notochord and nuclei pulposi: a study of gene families across the chordate phylum
Source: PubMed Central journal article supplement (PMC10605842; doi:10.1186/s12862-023-02167-1), 2023-10-27

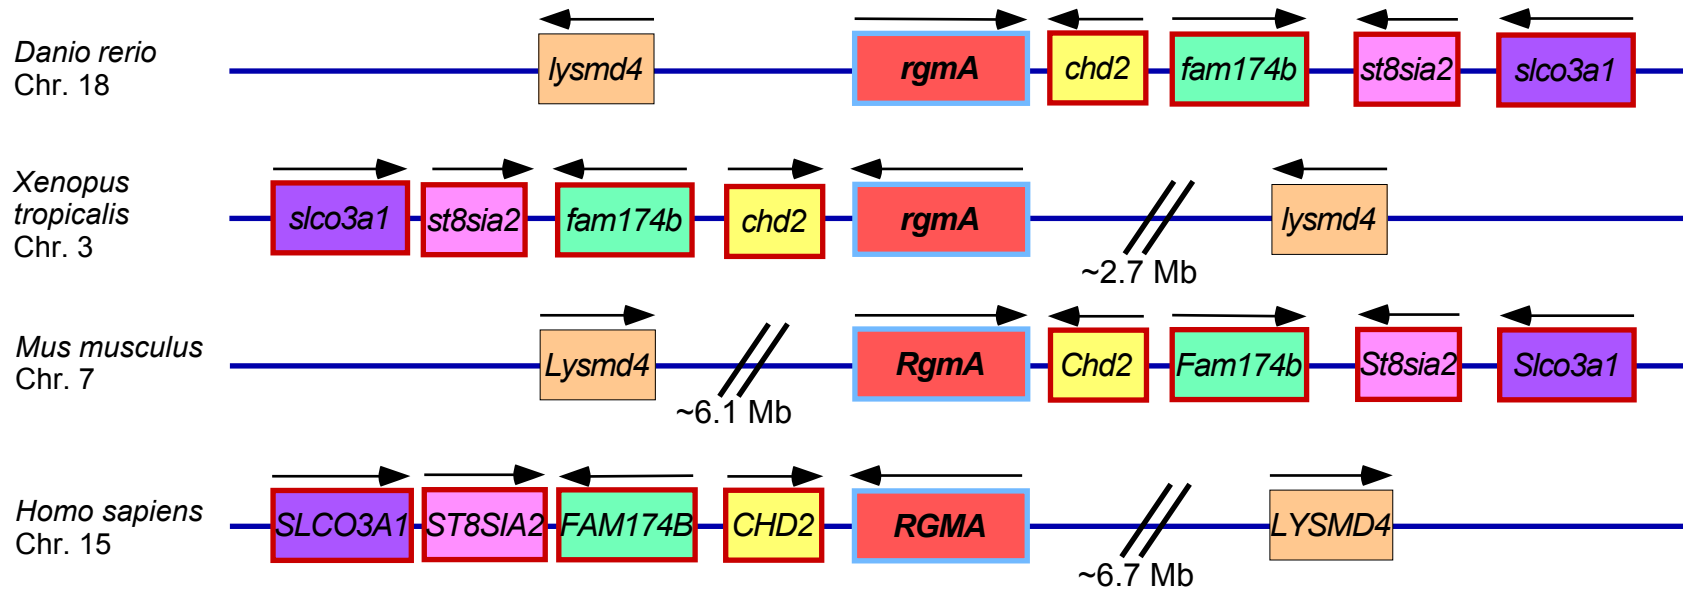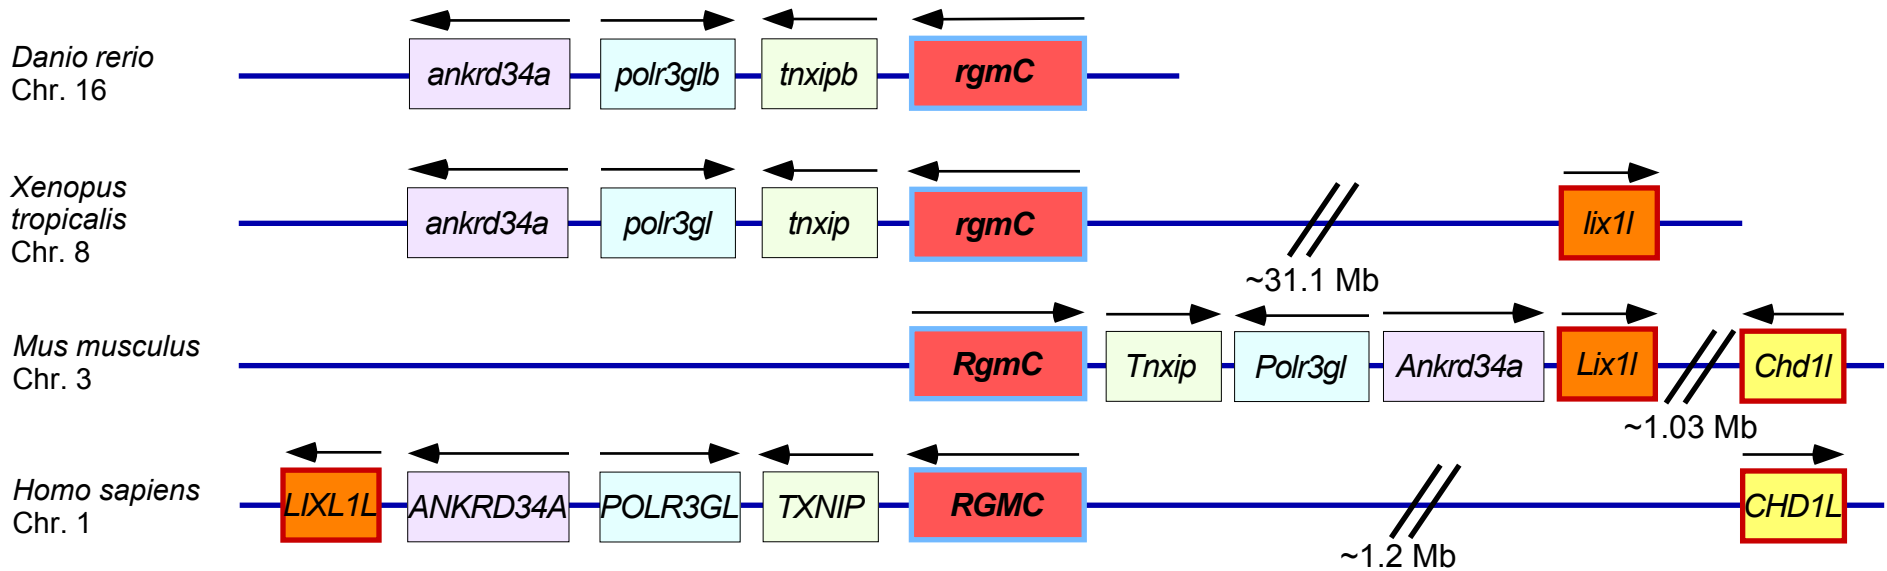

Supplement: 12862_2023_2167_MOESM3_ESM.pdf [file 12862_2023_2167_MOESM3_ESM.pdf]
