# Supplementary material for: Gene expression in notochord and nuclei pulposi: a study of gene families across the chordate phylum
Source: PubMed Central journal article supplement (PMC10605842; doi:10.1186/s12862-023-02167-1), 2023-10-27

*Saccoglossus kowalevskii*  
NW\_003155238.1

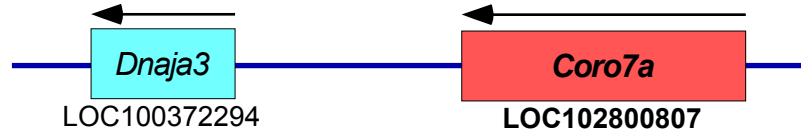

*Ciona robusta*  
Chr. 2

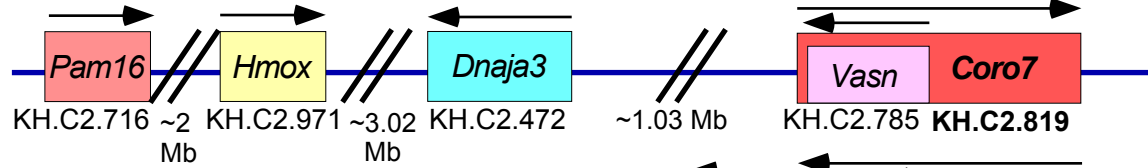

*Lepisosteus oculatus*  
Chr. LG13

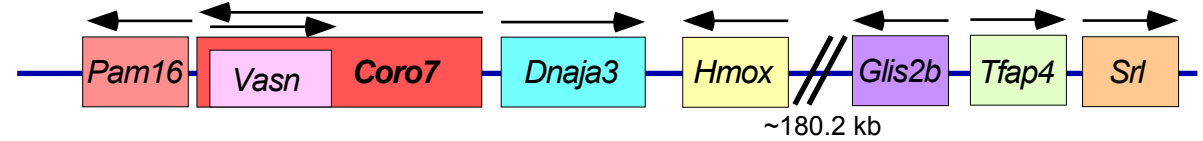

*Danio rerio*  
Chr. 3

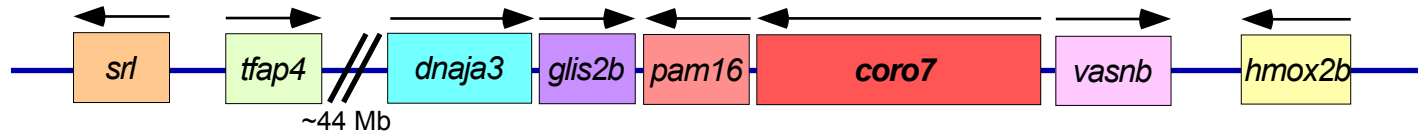

*Xenopus tropicalis*  
Chr. 9

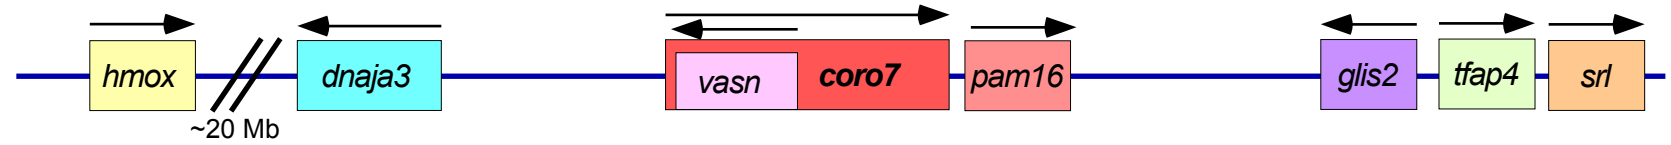

*Mus musculus*  
Chr. 16

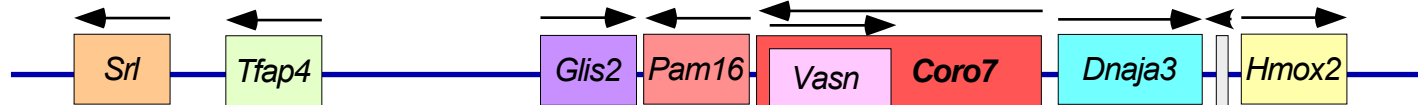

*Homo sapiens*  
Chr. 16

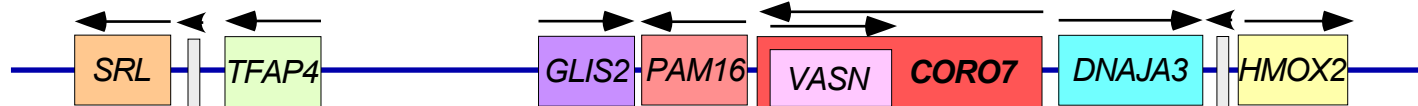

Supplement: 12862_2023_2167_MOESM6_ESM.pdf [file 12862_2023_2167_MOESM6_ESM.pdf]
